# Supplementary material
Source: MDPI journal article supplement (https://www.mdpi.com/2073-4352/13/9/1297)
Supplement: s1 [file s1 › crystals-2499807-supplementary.pdf]

# Non-Collinear Phase in Rare-Earth Iron Garnet Films near the Compensation Temperature

Dmitry A. Suslov <sup>1,\*</sup>, Petr M. Vetoshko <sup>1,2</sup>, Alexei V. Mashirov <sup>1</sup>, Sergei V. Taskaev <sup>3</sup>,  
Sergei N. Polulyakh <sup>2</sup>, Vladimir N. Berzhansky <sup>2</sup> and Vladimir G. Shavrov <sup>1</sup>

<sup>1</sup> Kotelnikov Institute of Radioengineering and Electronic, Russian Academy of Sciences, 125009 Moscow, Russia; pvetoshko@mail.ru (P.M.V.); a.v.mashirov@mail.ru (A.V.M.); shavrov@cplire.ru (V.G.S.)

<sup>2</sup> V. I. Vernadsky Crimean Federal University, 295007 Simferopol, Russia; s.polulyakh@gmail.com (S.N.P.); v.n.berzhansky@gmail.com (V.N.B.)

<sup>3</sup> Chelyabinsk State University, 454001 Chelyabinsk, Russia; s.v.taskaev@gmail.com

\* Correspondence: sda\_53@mail.ru

An essential condition for liquid-phase epitaxy (LPE) of samples was the need to provide the possibility of magneto-optical observation of magnetic phases. This condition required the introduction of sufficiently large amount, on the order of 1 f.u., of magneto-optically active Bi<sup>3+</sup> ions into the film composition. To ensure the inclusion of Bi<sup>3+</sup> ions in such an amount, the Blenk-Nielson coefficients [19] were chosen in the range from 13 to 15 for R<sub>1</sub> and from 7 to 12 for R<sub>4</sub> (Table S1). The remaining coefficients R<sub>2</sub> and R<sub>3</sub> were selected in accordance with the required Ga concentration during the synthesis of films with given values of the magnetic compensation temperature. The melt composition for LPE synthesis films (BiGd)<sub>3</sub>(FeGa)<sub>5</sub>O<sub>12</sub> and (BiYLu)<sub>3</sub>(FeGa)<sub>5</sub>O<sub>12</sub> is given in Table S2. The optimal growth temperature T<sub>growth</sub> and rate V<sub>growth</sub> are presented in Table S1.

**Table S1.** Main LPE growth parameters.

| No. | Sample                                                   | R <sub>1</sub> | R <sub>4</sub> | T <sub>growth</sub> , °C | V <sub>growth</sub> , mk/min | h, mkm |
|-----|----------------------------------------------------------|----------------|----------------|--------------------------|------------------------------|--------|
| 1   | (BiGd) <sub>3</sub> (FeGa) <sub>5</sub> O <sub>12</sub>  | 15.5           | 6.9            | 743.3                    | 0.36                         | 5.1    |
| 2   | (BiYLu) <sub>3</sub> (FeGa) <sub>5</sub> O <sub>12</sub> | 14             | 12             | 816.5                    | 0.62                         | 4.9    |

**Table S2.** Melt composition in molar percent [mol%].

| Sample                                                   | Bi <sub>2</sub> O <sub>3</sub> | PbO   | Li <sub>2</sub> CO <sub>3</sub> | Fe <sub>2</sub> O <sub>3</sub> | Ga <sub>2</sub> O <sub>3</sub> | Al <sub>2</sub> O <sub>3</sub> | Y <sub>2</sub> O <sub>3</sub> | Lu <sub>2</sub> O <sub>3</sub> | Gd <sub>2</sub> O <sub>3</sub> |
|----------------------------------------------------------|--------------------------------|-------|---------------------------------|--------------------------------|--------------------------------|--------------------------------|-------------------------------|--------------------------------|--------------------------------|
| (BiGd) <sub>3</sub> (FeGa) <sub>5</sub> O <sub>12</sub>  | 39.45                          | 53.57 | -                               | 6.1                            | 0.36                           | 0.1                            | -                             | -                              | 0.42                           |
| (BiYLu) <sub>3</sub> (FeGa) <sub>5</sub> O <sub>12</sub> | 68.25                          | -     | 19.58                           | 10.2                           | 1.81                           | -                              | 0.34                          | 0.51                           | -                              |

Single-crystal substrates (GdCa)<sub>3</sub>(GaMgZr)<sub>5</sub>O<sub>12</sub> and Gd<sub>3</sub>Ga<sub>5</sub>O<sub>12</sub> were used for the epitaxial synthesis of (BiGd)<sub>3</sub>(FeGa)<sub>5</sub>O<sub>12</sub> and (BiYLu)<sub>3</sub>(FeGa)<sub>5</sub>O<sub>12</sub> films, respectively. All substrates had the (111) plane orientation.

The structural characterization of films were ascertained using X-ray diffraction (XRD) with Cu-K $\alpha$  radiation (1.5406 Å). The mismatch parameter between the crystalline cells of the films and the substrates  $\Delta a$  did not exceed 0.008 Å for both compounds.

The crystalline quality of the synthesized films was also estimated from the half-width of the rocking curves FWHM, the value of which did not exceed 20'' for both compounds. As an example, Figure S1 shows the rocking curve for the film (BiGd)<sub>3</sub>(FeGa)<sub>5</sub>O<sub>12</sub> (888) peak with FWHM 16.92''.

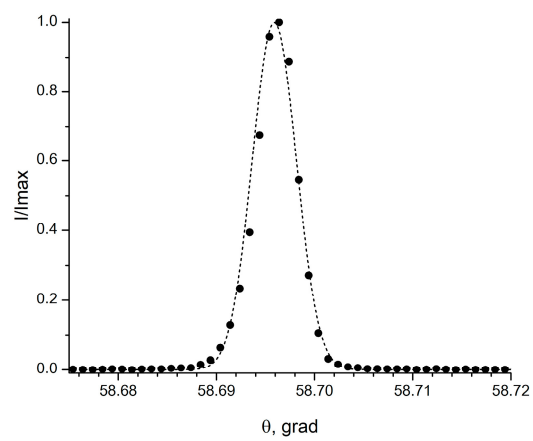

**Figure S1.** Rocking curve of the  $(\text{BiGd})_3(\text{FeGa})_5\text{O}_{12}$  (888) peak.
